# Supplementary material for: Impact of tuberculosis on mortality among HIV-infected patients receiving antiretroviral therapy in Uganda: a prospective cohort analysis
Source: PubMed Central journal article supplement (PMC3716897; doi:10.1186/1742-6405-10-19), 2013-07-13
Supplement: 1742-6405-10-19-S2.pdf [file 1742-6405-10-19-S2.pdf]

**Enrollment**

Received ART during 2000 to 2009  
(n=23,802)

Excluded (n=1325)  
♦ Data quality (n=236)  
♦ Patient younger than 14 years  
(n=1089)

Total recruited (n=22,477)

**Exposure**

Active TB at ART initiation (n=1,690)

No active TB at ART initiation  
(n=20,787)

**Analysis**

Analysed (n= 1,690)

Analysed (n= 20,787)
